# Supplementary material
Source: PubMed Central journal article supplement (PMC4434708)
Supplement: pnas.201505787SI.pdf [file pnas.201505787SI.pdf]

# Supporting Information

Shuda et al. 10.1073/pnas.1505787112

## SI Materials and Methods

**Cell Culture and Transfection/Transduction.** The 293, 293FT, U2OS, HeLa, and BJ-T cells were maintained in DMEM (Corning Cellgro) supplemented with 10% FBS. The 293 and 293FT cells were transfected using Lipofectamine 2000 (Invitrogen) and harvested after 48 h.

**Kinase Inhibitors.** The following active-site kinase inhibitors were dissolved in DMSO and used for kinase inhibition and in vitro phosphorylation experiments: mTOR kinase inhibitor PP242 (Selleckchem), CDK1 kinase inhibitor RO-3306 (Calbiochem), and pan Aurora kinase inhibitor VX-680 (Selleckchem).

**Plasmids and Transfections.** Plasmids pcDNA6.sTco (wild-type MCV sT, codon optimized) and pcDNA6.sT<sup>mLSD</sup> that were used for transient transfection experiments are previously described (1, 2). To efficiently express SV40 sT, codon-optimized SV40 sT [GenBank accession no. KM359729 (3)] was generated by overlapping PCR.

**Immunoblotting and Antibodies.** Cells were lysed in lysis buffer (50 mM Tris-HCl, pH 7.4, 0.15 M NaCl, 1% Triton X-100, 2 mM Na<sub>3</sub>VO<sub>4</sub>, 2 mM NaF, and 0.1% SDS) containing protease inhibitors (Roche). Lysates were resolved by 12% SDS/PAGE and transferred to nitrocellulose. Membranes were blocked with 5% milk in 1× TBS and incubated with primary antibodies overnight at 4 °C. Blots were subsequently incubated with IRDye-labeled anti-rabbit or anti-mouse secondary antibodies and analyzed on

the Odyssey infrared scanner (LI-COR Biosciences). The following primary antibodies were used in this study: total 4E-BP1, phospho-4E-BP1<sup>T37/T46</sup>, phospho-4E-BP1<sup>T70</sup>, phospho-4E-BP1<sup>S65</sup>, eIF4E, eIF4G, phospho-S6<sup>S235/S236</sup>, total S6, phospho-histone H3<sup>S10</sup>, total histone H3, cdc25C, phospho-Aurora A/B/C, total Aurora A, total Aurora B, Skp2, Cdc20, Plk1, Claspin (Cell Signaling), total Aurora C, phospho-MPM2 (Millipore), Cdh1 (Calbiochem), CYCA, CYCD1, c-Myc (Santa Cruz Biotechnology), HA (Covance), FLAG (Sigma-Aldrich), 800CW goat polyclonal anti-rabbit IgG, and 680CW goat polyclonal anti-mouse IgG (LI-COR Biosciences). Previously described CM8E6 (2) and CM5E1 (1) were used to detect MCV sT. For CHX chase assays, BJ-T cells were treated with 100 µg/mL CHX and harvested at different time points for immunoblotting.

**Immunoprecipitation.** The 293 cells cotransfected with sT constructs and myc-cdh1, HA-cdc20, or pcDNA6 empty vector were harvested after 48 h and lysed in IP lysis buffer (50 mM Tris-HCl, pH 7.4, 0.15 M NaCl, 1% Triton X-100, 2 mM Na<sub>3</sub>VO<sub>4</sub>, and 2 mM NaF) supplemented with protease inhibitors (Roche). Precleared lysates were incubated with either anti-myc tag or anti-HA antibodies overnight at 4 °C. Immune complexes were precipitated with protein A/G Sepharose beads (Santa Cruz) for 1 h at 4 °C. Beads were collected, washed with lysis buffer, and boiled in 1× SDS loading buffer. Samples were subjected to SDS/PAGE and immunoblotting.

1. Shuda M, Kwun HJ, Feng H, Chang Y, Moore PS (2011) Human Merkel cell polyomavirus small T antigen is an oncoprotein targeting the 4E-BP1 translation regulator. *J Clin Invest* 121(9):3623–3634.
2. Kwun HJ, et al. (2013) Merkel cell polyomavirus small T antigen controls viral replication and oncoprotein expression by targeting the cellular ubiquitin ligase SCFFbw7. *Cell Host Microbe* 14(2):125–135.

3. Kwun HJ, et al. (2015) Restricted protein phosphatase 2A targeting by Merkel cell polyomavirus small T antigen. *J Virol* 89(8):4191–4200.

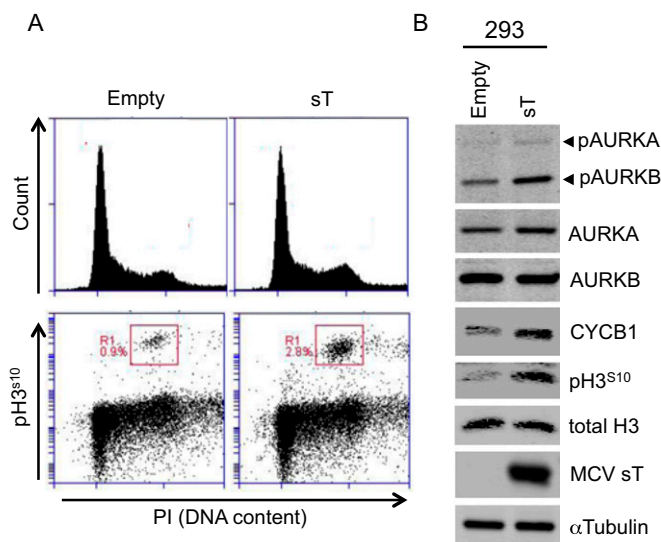

**Fig. S1.** MCV sT increases mitogenesis in 293 cells. (A) MCV sT expression increases phospho-histone H3<sup>S10</sup> (pH3<sup>S10</sup>)-positive mitotic cells. (B) MCV sT expression in 293 cells increases mitotic marker expression including pAURKA and pAURKB, CYCB1, and pH3<sup>S10</sup>. Transfected 293 cells were split into two fractions for cell cycle profile (A) and mitosis marker immunoblotting (B).

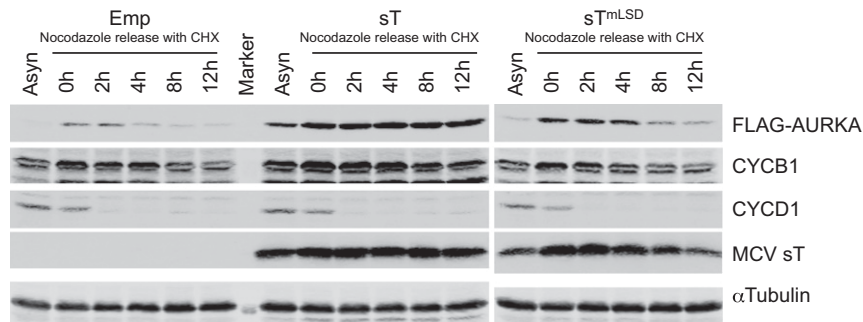

**Fig. S2.** MCV sT stabilizes APC/C targets (AURKA and CYCB1) in nocodazole-arrested 293 cells. The 293 cells cotransfected with FLAG-tagged AURKA and MCV sT, sT<sup>mLSD</sup>, or empty vector were arrested with nocodazole (0.5  $\mu$ M) for 15 h and then treated with CHX after nocodazole washout and harvested at different time points for immunoblotting. Asynchronous cells for each transfection were used as a control for nocodazole arrest. MCV sT but not sT<sup>mLSD</sup> or empty vector stabilizes AURKA and CYCB1 proteins in metaphase-arrested 293 cells. MCV sT increased FLAG-AURKA and CYCB1 expression in asynchronous cells, consistent with sT induction of increased mitogenesis.

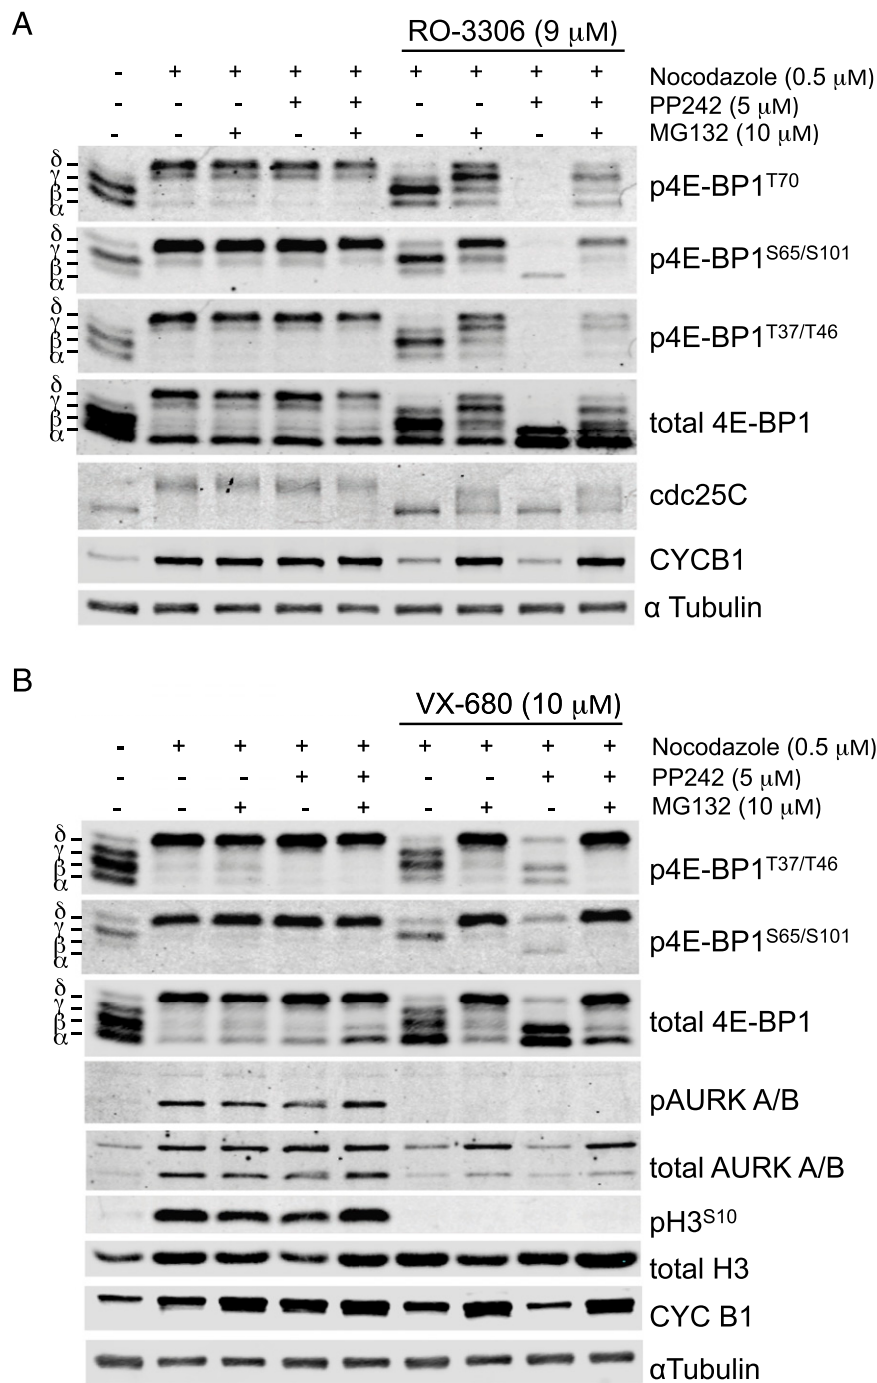

**Fig. S3.** Mitotic slippage with mitotic kinase inhibition. (A) CDK1 inhibition during nocodazole/MG132 treatment fails to fully restore  $\delta$ -4E-BP1 hyperphosphorylation. Notably, residual 4E-BP1 phosphorylation during RO-3306 treatment is further reduced by PP242 treatment, suggesting that mTOR phosphorylation may partially restore 4E-BP1 phosphorylation under conditions of CDK1 inhibition. Cdc25C is a direct phosphorylation target for CDK1. (B) The same experiment as in A was repeated using the pan-AURK inhibitor VX-680. Treatment with VX-680 reduces 4E-BP1 hyperphosphorylation in nocodazole-arrested HeLa cells by inducing mitotic exit. When HeLa cells were arrested with nocodazole (0.5  $\mu$ M) for 16 h and treated with the proteasome inhibitor MG132 (10  $\mu$ M) to prevent APC/C-mediated mitotic exit, VX-680 no longer prevents 4E-BP1 hyperphosphorylation but does inhibit AURKB-mediated phosphorylation of H3<sup>S10</sup>.
